# Supplementary material
Source: publisher site journal article supplement (https://www.dovepress.com/article/339318)
Supplement: Supplementary file 1 [file get_supplementary_file.php]

**Supplementary**

**Table S1** The full name and abbreviation of the clinical variables included in this study

| **Abbreviation name** | **Full name** | **Abbreviation name** | **Full name** |
| --- | --- | --- | --- |
| AGE | Age when detecting concentration | PLT0 | Platelet count before administration |
| AGE0 | Age before administration | PT | Pathological types |
| ALB | Albumin levels at 3 months | RP | Urine retinol-binding protein levels at 3 months |
| ALB0 | Albumin levels before administration | RP0 | Urine retinol-binding protein levels before administration |
| ALT | Alanine aminotransferase levels at 3 months | SCr | Serum creatinine levels at 3 months |
| ALT0 | Alanine aminotransferase levels before administration | SCr0 | Serum creatinine levels before administration |
| AST | Aspartate aminotransferase levels at 3 months | SFGR | Whether infection occurred when detecting tacrolimus concentration |
| AST0 | Aspartate aminotransferase levels before administration | ST | Steroid types |
| Bβ2MG | Blood β2 microglobulin levels at 3 months | TC | Total cholesterol levels at 3 months |
| Bβ2MG0 | Blood β2 microglobulin levels before administration | TC0 | Total cholesterol levels before administration |
| C3 | Blood complement 3 levels at 3 months | TG | Triglyceride levels at 3 months |
| C30 | Blood complement 3 levels before administration | TG0 | Triglyceride levels before administration |
| C4 | Blood complement 4 levels at 3 months | UACR | Urine microalbumin levels to urine creatinine levels ratio at 3 months |
| C40 | Blood complement 4 levels before administration | UACR0 | Urine microalbumin levels to urine creatinine levels ratio before administration |
| C0/D | TAC dose-adjusted trough concentrations | UALB | Urine microalbumin levels at 3 months |
| Comb-drugs-pk1 | Whether to combined use Wuzhi tablet, ketoconazole or fluconazole etc. when detecting tacrolimus concentration | UALB0 | Urine microalbumin levels before administration |
| Comb-drugs-pk2 | Whether to combined use rifampicin or Chinese herbal medicine when detecting tacrolimus concentration | Ucr | Urine creatinine levels at 3 months |
| Conc | Tacrolimus concentration at 3 months | UCr0 | Urine creatinine levels before administration |
| CysC | Cystatin C levels at 3 months | UIgG | Urine immunoglobulin levels at 3 months |
| CysC0 | Cystatin C levels before administration | UIgG0 | Urine immunoglobulin levels before administration |
| Daily Dose | Daily dose of tacrolimus on the first day | UPro | Urine protein levels at 3 months |
| Daily Dose3m | Daily dose of tacrolimus before detecting concentration at 3 months | UPro0 | Urine protein levels before administration |
| DD | Blood D-Dimer levels at 3 months | UproQ | 24h urine protein levels at 3 months |
| DD0 | Blood D-Dimer levels before administration | UproQ0 | 24h urine protein levels before administration |
| D-duration | Disease duration before taking tacrolimus | Ur | Urea levels at 3 months |
| Dose3m | Total dose of tacrolimus at 3 months | Ur0 | Urea levels before administration |
| Fib | Fibrinogen levels at 3 months | URBC | Urine erythrocyte at 3 months |
| Fib0 | Fibrinogen levels before administration | URBC0 | Urine erythrocyte before administration |
| FSGS | Focal segmental glomurular sclerosis | US | Urine sugar levels at 3 months |
| GENDER | Gender | US0 | Urine sugar levels before administration |
| Glu | Blood sugar levels at 3 months | USG | Urine specific gravity at 3 months |
| Glu0 | Blood sugar levels before administration | USG0 | Urine specific gravity before administration |
| HB | Hemoglobin levels at 3 months | Uβ2MG | Urine β2 microglobulin levels at 3 months |
| HB0 | Hemoglobin levels before administration | Uβ2MG0 | Urine β2 microglobulin levels before administration |
| HCT | Hematocrit at 3 months | Uβ2MGCR | Urine β2 microglobulin levels to urine creatinine levels ratio at 3 months |
| HCT0 | Hematocrit before administration | Uβ2MGCR0 | Urine β2 microglobulin levels to urine creatinine levels ratio before administration |
| K | Serum potassium levels at 3 months | WBC | Leukocyte count at 3 months |
| K0 | Serum potassium levels before administration | WBC0 | Leukocyte count before administration |
| MCD | Minimal change disease | WEIGHT | Weight before detecting concentration at 3 months |
| NAG | Urine N-acetyl β-D-glucosaminidase levels at 3 months | WEIGHT0 | Weight before administration |
| NAG0 | Urine N-acetyl β-D-glucosaminidase levels before administration | α1MG | Urine α1-microglobulin levels at 3 months |
| PLT | Platelet count at 3 months | α1MG0 | Urine α1-microglobulin levels before administration |

**Table S2** All single nucleotide polymorphisms (SNPs) included in this study*

| **Coding genes of pharmacokinetic pathway-related proteins** | **Coding genes of transcriptional regulation related proteins** | **Coding genes of kidney disease related proteins** | **Coding genes of the other proteins** |
| --- | --- | --- | --- |
| *CYP3A4* rs2242480 | *CRTC2* rs8450 | *ACTN4* rs3745859 | *ADIPOQ* rs1501299 |
| *CYP3A4* rs4646437 | *DDIT3* rs1148557 | *ACTN4* rs56113315 | *ANGPTL4* rs1044250 |
| *CYP3A5* rs776746 | *DDIT3* rs697221 | *ACTN4* rs62121818 | *ANGPTL 4*rs2042899 |
| *CYP4F2* rs2108622 | *DDIT3* rs703835 | *ARHGAP24* rs17010887 | *ANGPTL4* rs4076317 |
| *MDR1* rs1045642 | *HNF4α* rs6031587 | *ARHGAP24* rs17010960 | *BAX* rs4645887 |
| *MDR1* rs1128503 | *IKBKB* rs9694985 | *ARHGDIA* rs11652950 | *BCL2* rs12457893 |
| *MDR1* rs2032582 | *JUN* rs4646999 | *ARHGDIA* rs34185514 | *BCL2* rs2850761 |
| *OATP1B1* rs2306283 | *JUN* rs4647001 | *CCN2* rs9399005 | *BCL2* rs34971240 |
| *POR* rs1057868 | *LMX1B* rs10733682 | *CD2AP* rs12664637 | *CCL2* rs1024611 |
| *POR* rs2868177 | *LMX1B* rs10987413 | *CD2AP* rs16876006 | *COQ2* rs10029891 |
|  | *LMX1B* rs10987417 | *CD2AP* rs4711880 | *COQ2* rs4693075 |
| **Coding genes of pharmacodynamic pathway-related proteins** | *LMX1B* rs13295990 | *CD2AP* rs719856 | *CTLA4* rs4553808 |
| *FKBP1A* rs1294689 | *LMX1B* rs2277158 | *CD2AP* rs9296560 | *HSPA5* rs12009 |
| *FKBP1A* rs1323135 | *LMX1B* rs71497630 | *INF2* rs1128880 | *IFNA1* rs1332190 |
| *FKBP5* rs1360780 | *LMX1B* rs7853174 | *INF2* rs12147772 | *IFNA1* rs1831583 |
| *FKBP5* rs9296158 | *NFKB1* rs230498 | *INF2* rs60468249 | *IFNA1* rs28383797 |
| *FKBP5* rs9470080 | *NFKB1* rs230526 | *ITGB4* rs2290460 | *KCNJ11* rs5219 |
| *MAP2K3* rs10468608 | *NFKB1* rs230532 | *ITGB4* rs62088212 | *LEP* rs2167270 |
| *MAP2K6* rs17223054 | *NFKB1* rs3774959 | *ITGB4* rs8669 | *MMP2* rs1132896 |
| *MAP2K6* rs17223089 | *NFKB1* rs4648050 | *ITGB4* rs871443 | *OLR1* rs1050283 |
| *MAP2K6* rs17223095 | *NFKBIA* rs8016947 | *ITGB4* rs9367 | *OLR1* rs1050286 |
| *MAP2K6* rs17690015 | *NR1H4* rs56163822 | *LAMB2* rs3768618 | *OLR1* rs10505755 |
| *MAP2K6* rs17823190 | *NR1I1* rs2853559 | *LAMB2* rs58189357 | *OLR1* rs11053646 |
| *MAP2K6* rs17823202 | *NR1I2* rs1951276 | *LAMB2* rs58325858 | *OLR1* rs34874375 |
| *MAP2K6* rs17823238 | *NR1I2* rs2233407 | *LAMB2* rs62119873 | *OLR1* rs3736232 |
| *MAP2K6* rs61289363 | *NR1I2* rs2276706 | *LAMB2* rs62119876 | *PPP2R3C* rs2415259 |
| *MAP3K11* rs1078457 | *NR1I2* rs3814055 | *LAMB2* rs62119877 | *PTPRO* rs11615050 |
| *MAP3K11* rs7946115 | *NR1I2* rs696 | *MYH9* rs12107 | *PTPRO* rs56260738 |
| *MAP3K11* rs948577 | *NR1I2* rs8904 | *MYH9* rs136206 | *ROS* rs17079069 |
| *MAP3K7* rs157702 | *PPARA* rs4253623 | *MYH9* rs2239781 | *ROS1*rs17079123 |
| *MAP3K7* rs157705 | *PPARA* rs4823613 | *MYH9* rs4821478 | *ROS1*rs529038 |
| *MAP3K7* rs205342 | *PPARA* rs5767743 | *MYH9* rs9619601 | *ROS1*rs2243380 |
| *MAP3K7* rs205343 | *RELA* rs2306365 | *MYO1E* rs56108450 | *SUMO4* rs237024 |
| *MAP3K7* rs791062 | *RELA* rs7119750 | *MYO1E* rs58948844 | *TGFB1* rs1800469 |
| *MAP3K7* rs967779 |  | *MYO1E* rs62004107 | *TGFB1* rs2073711 |
| *MAPK14* rs16884628 | **Coding genes of inflammatory cytokines** | *NPHS1* rs2071327 | *TGFB1* rs2241715 |
| *MAPK14* rs3804454 | *IL10* rs1800871 | *NPHS1* rs2285450 | *TGFB1*rs4803455 |
| *MAPK14* rs56156688 | *IL10* rs1800872 | *NPHS1* rs3814995 | *TGFB1* rs8105161 |
| *MAPK14* rs61763101 | *IL13* rs1295685 | *NPHS1* rs401824 | *TGFB2* rs61823428 |
| *MAPK14* rs851007 | *IL13* rs20541 | *NPHS1* rs437168 | *TGFB2* rs6683598 |
| *MAPK8* rs10776592 | *IL13* rs847 | *NPHS2* rs1079292 | *TGFB2* rs6704255 |
| *MAPK8* rs10857561 | *IL13* rs848 | *NPHS2* rs1410591 | *TGFB2* rs900 |
| *MAPK8* rs4838590 | *IL17* rs763780 | *NPHS2* rs1410592 | *TGFB2* rs991967 |
| *NFATC1* rs1660144 | *IL18* rs5744247 | *NPHS2* rs2274622 | *TGFB3* rs2268624 |
| *NFATC1* rs61658505 | *IL28B* rs12979860 | *NPHS2* rs2274623 | *TGFB3* rs2268626 |
| *NFATC1* rs754093 | *IL2RA* rs12722489 | *NPHS2* rs34693426 | *TGFB3* rs3917158 |
| *NFATC1* rs8090312 | *IL2RA* rs2104286 | *NPHS2* rs3818587 | *TGFB3* rs3917170 |
| *NFATC4* rs10141896 | *IL2RA* rs3118470 | *PDSS2* rs10214819 | *TLR4* rs1927907 |
| *PPP3CB* rs3763679 | *IL2RA* rs4147359 | *PDSS2* rs12200194 | *TLR4* rs1927914 |
| *PPP3CC* rs1075534 | *IL2RA* rs706778 | *PDSS2* rs17067991 | *TLR6* rs3775073 |
| *PPP3CC* rs2461483 | *IL2* rs2069762 | *PDSS2* rs8180652 | *TLR6* rs3821985 |
| *PPP3R1* rs1868402 | *IL2* rs2069763 | *PLCE1* rs11187870 | *TNFAIP3* rs3757173 |
| *PPP3R1* rs4347819 | *IL4R* rs1801275 | *PLCE1* rs17109671 | *ZMPSTE24* rs10489431 |
| *PPP3R1* rs4519508 | *IL4R* rs2107356 | *PLCE1* rs17417407 | *ZMPSTE24* rs2076697 |
|  | *IL4* rs2070874 | *PLCE1* rs2274223 | *ZMPSTE24* rs7516571 |
| **Coding genes of hormone invertase** | *IL4* rs2243250 | *PLCE1* rs2274224 |  |
| *HSD11B1* rs4844880 | *IL6R* rs2229238 | *PLCE1* rs35443777 |  |
| *HSD11B1* rs846908 | *TNF* rs1799724 | *SCARB2* rs61598131 |  |
| *HSD11B1* rs846910 | *TNF* rs1799964 | *SCARB2* rs6823680 |  |
|  | *TNF* rs1800610 | *SCARB2* rs7664889 |  |
|  |  | *SMARCAL1* rs11886806 |  |
|  |  | *SMARCAL1* rs184028 |  |
|  |  | *SMARCAL1* rs1983218 |  |
|  |  | *SMARCAL1* rs3755141 |  |
|  |  | *TRPC6* rs10501986 |  |
|  |  | *TRPC6* rs10895134 |  |
|  |  | *TRPC6* rs11224806 |  |
|  |  | *TRPC6* rs3824934 |  |
|  |  | *WT1* rs10742277 |  |
|  |  | *WT1* rs16754 |  |
|  |  | *WT1* rs1799925 |  |
|  |  | *WT1* rs1799937 |  |
|  |  | *WT1* rs5030207 |  |
|  |  | *WT1* rs5030317 |  |
|  |  | *WT1* rs5030320 |  |
|  |  | *WT1* rs9332974 |  |

* These genetic variables were also included in another study. (Mo, Xiaolan et al. Early Prediction of Tacrolimus-Induced Tubular Toxicity in Pediatric Refractory Nephrotic Syndrome Using Machine Learning. *Frontiers in pharmacology.* vol. 12 638724. 27 Aug. 2021, doi:10.3389/fphar.2021.638724)

**Table S3** The main hyperparameters of each machine learning method

| **Groups** | **Alpha** | **Learning Rate** | **Gamma** | **Max Features** | **Max depth** |
| --- | --- | --- | --- | --- | --- |
| **Whole group** | | | | | |
| Lasso | 0.39 | - | - | - | - |
| XGBoost | - | 0.015 | 0.34 | - | 3 |
| ET | - | - | - | 5 | 7 |
| RF | - | - | - | 3 | 5 |
| GBDT | 0.2 | 0.035 | - | - | 2 |
| **CYP3A5 expresser group** | | | | | |
| Lasso | 1.19 | - | - | - | - |
| XGBoost | - | 0.01 | 0.39 | - | 3 |
| ET | - | - | - | - | 7 |
| RF | - | - | - | 3 | 4 |
| GBDT | 0.0125 | 0.005 | - | - | 4 |
| **CYP3A5 nonexpresser group** | | | | | |
| Lasso | 0.09 | - | - | - | - |
| XGBoost | - | 0.01 | 0.39 | - | 3 |
| ET | - | - | - | - | 5 |
| RF | - | - | - | - | 7 |
| GBDT | 0.0595 | 0.025 | - | - | - |


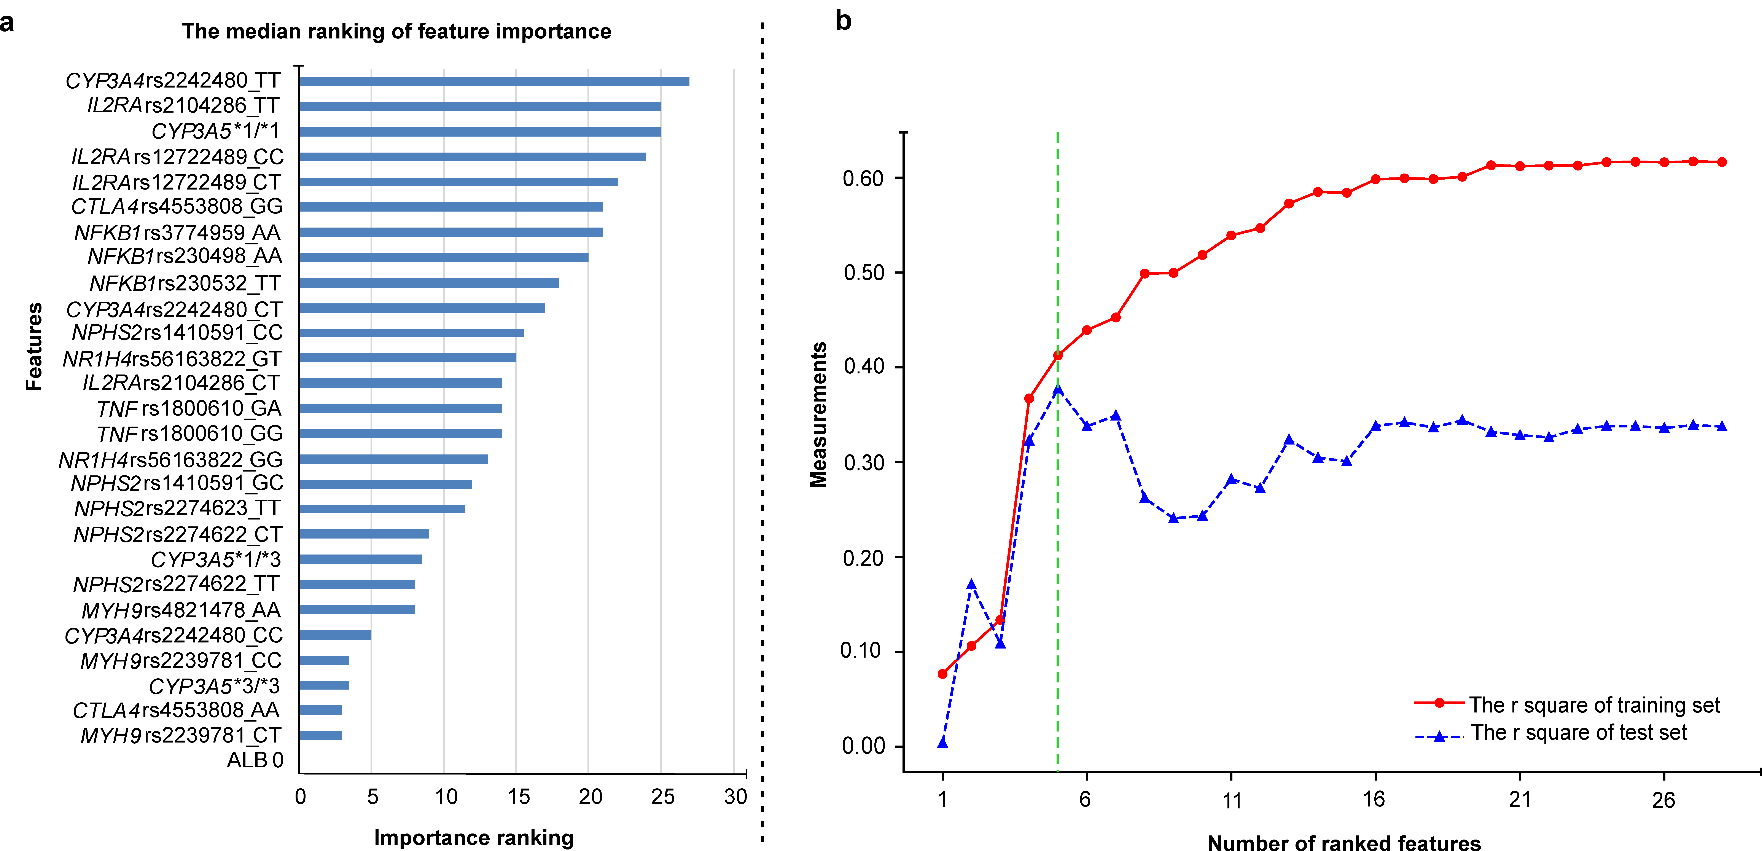


**Figure S1.** The variables used for modeling and their importance ranking (a) and the forward feature selection results for the model of variables (b) in the whole group. The smaller the median value, the more important the variable (a). And the R2 of the model based on the test set reaches maximized when the most appropriate variable is incrementally added, so five variables constitute the best feature set, including ALB0, *CYP3A5**3/*3, *MYH9* rs2239781_CT, *MYH9* rs2239781_CC, and *CTLA4* rs4553808_AA (b).


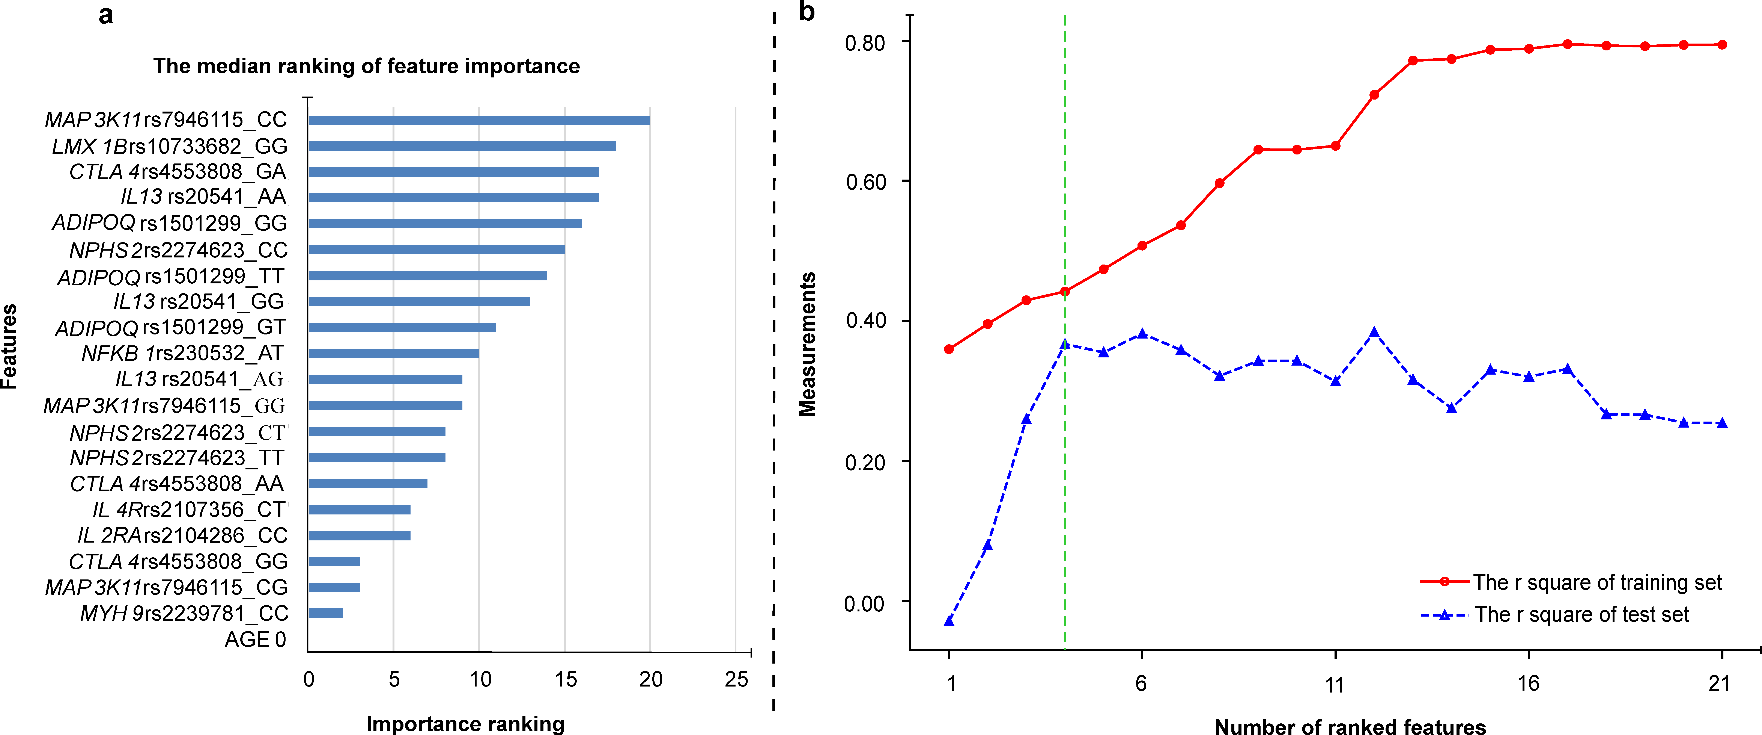
**Figure S2.** The variables used for modeling and their importance ranking (a) and the forward feature selection results for the model of variables (b) in the CYP3A5 expresser group. The smaller the value, the greater importance of the median ranking of the variable(a). And when four variables are included, the R2 of the model based on the test set reach maximized, so these four variables constitute the best feature set, including AGE0, *MYH9* rs2239781_CC, *MAP3K11* rs7946115_CG, and *CTLA4* rs4553808_GG (b).


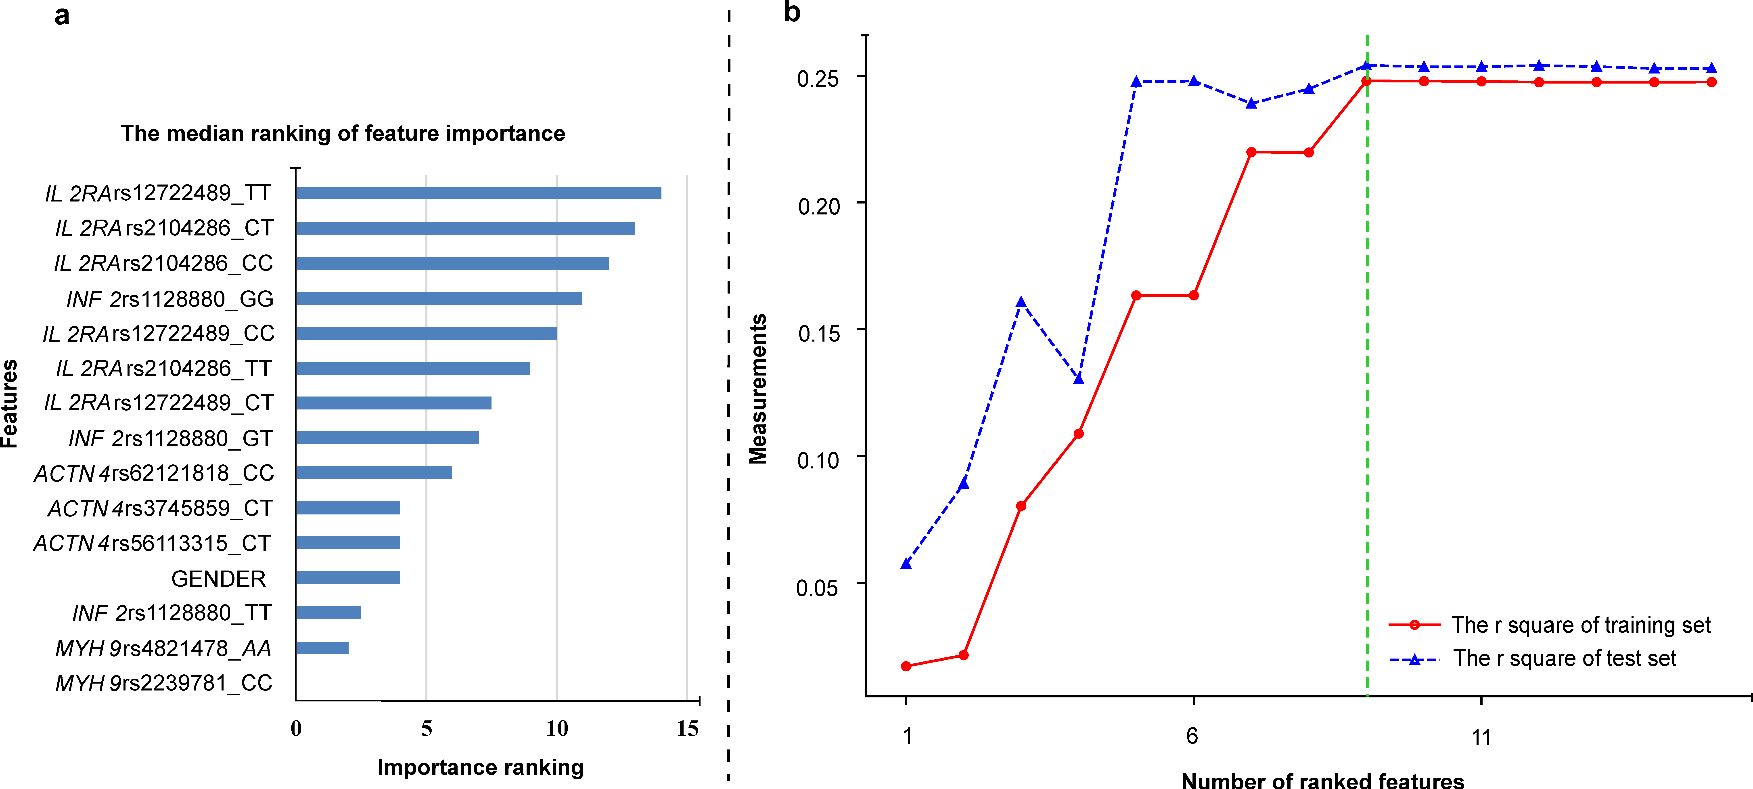


**Figure S3.** The variables used for modeling and their importance ranking (a) and the forward feature selection results for the model of variables (b) in the CYP3A5 nonexpresser group. The shorter the transverse column, the more important the variable (a). And when the variables increase to nine, the R2 of the model based on the test set reach maximized, so these nine variables constitute the best feature set, including GENDER, *MYH9* rs2239781_CC, *MYH9* rs4821478_AA, *ACTN4* rs56113315_CT, *INF2* rs1128880_TT, *ACTN4* rs3745859_CT, *ACTN*4 rs62121818_CC, *INF2* rs1128880_GT, and *IL2RA* rs12722489_CT (b).
